# Supplementary material for: Constructing multicancer risk cohorts using national data from medical helplines and secondary care
Source: Research Square preprint supplement (doi:10.21203/rs.3.rs-5701032/v1), 2025-02-21
Supplement: Supplementary file 1 [file deb5c1184766011f44f72da0.docx]

**Supplementary Material**

The full list of features we include in our analysis can be found in Supplementary Table 1.

| **Supplementary Table 1.** List of features |
| --- |
| Age |
| Gender |
| Ethnicity (16 separate features) |
| Index of multiple deprivation (10 features corresponding to deciles) |
| Integrated care board (42 features corresponding to each ICB) |
| **Bridges to Health dataset (list of variables below – all these are indicator variables)** |
| Disability |
| Organ failure |
| Frailty/dementia |
| Long-term condition |
| Intermediate frailty risk |
| High frailty risk |
| Alcohol dependence |
| Asthma |
| Atrial fibrillation |
| Autism |
| Bone marrow and stem cell transplants |
| Bronchiectasis |
| COPD |
| Cerebral palsy |
| Cerebrovascular disease |
| Chronic kidney disease |
| Chronic liver disease |
| Chronic pain |
| Congenital heart disease |
| Coronary heart disease |
| Cystic fibrosis |
| Dementia |
| Depression |
| Diabetes |
| Downs syndrome |
| End stage renal failure |
| Epilepsy |
| Heart failure |
| Hypertension |
| Immunocompromised |
| Inflammatory bowel disease |
| Learning disability |
| Liver failure |
| Maternal health |
| Maternal and infant health |
| Multiple sclerosis |
| Neurological organ failure |
| Obesity |
| Organ transplant |
| Osteoarthritis |
| Osteoporosis |
| Other chronic neurological diseases |
| Other chronic respiratory diseases |
| Palliative care |
| Parkinson’s disease |
| Peripheral vascular disease |
| Physical disability |
| Pulmonary embolism |
| Pulmonary heart disease |
| Rare diseases |
| Rheumatoid arthritis |
| Sarcoidosis |
| Serious mental illness |
| Severe asthma |
| Severe COPD |
| Severe heart failure |
| Severe interstitial lung disease |
| Sickle cell disease |
| Spleen problems |
| Care home flag |
| Acorn household type (62 features corresponding to the different household types) |
| **ICD-10 codes** |
| Comorbidities diagnosed in last 5 years (263 groups of conditions based on ICD-10 codes) |
| Comorbidities diagnosed in last year (263 groups of conditions on ICD-10 codes) |
| **Frequency of interactions – secondary care** |
| Number of A&E attendances (last year) |
| Number of admissions-inpatient (last year) |
| Percentage of admissions with recorded diagnosis |
| Number of outpatient appointments (last year) |
| **Calls to NHS 111 lines** |
| Number of calls to 111 lines (last year) |
| Number of calls to 111 lines (last 5 years) |
| Number of calls to 111 lines reporting a cancer related symptom (last year) |
| Number of calls to 111 lines – abdominal flank groin or back pain or swelling (last year) |
| Number of calls to 111 lines – abdominal pain/ pregnant over 20 weeks (last year) |
| Number of calls to 111 lines – abdominal pain/ rectal bleeding /pregnant over 20 weeks (last year) |
| Number of calls to 111 lines – abdominal pain (last year) |
| Number of calls to 111 lines – blood in urine (last year) |
| Number of calls to 111 lines – breast lump/pregnant (last year) |
| Number of calls to 111 lines – breast lump (last year) |
| Number of calls to 111 lines – breathing problems/breathlessness or wheeze pregnant (last year) |
| Number of calls to 111 lines – breathing problems/breathlessness or wheeze pregnant (last year) |
| Number of calls to 111 lines – chest and upper back pain (last year) |
| Number of calls to 111 lines – constipation (last year) |
| Number of calls to 111 lines – cough (last year) |
| Number of calls to 111 lines – coughing up blood (last year) |
| Number of calls to 111 lines – diarrhoea (last year) |
| Number of calls to 111 lines – diarrhoea and vomiting (last year) |
| Number of calls to 111 lines – difficulty passing urine (last year) |
| Number of calls to 111 lines – easy or unexplained bruising (last year) |
| Number of calls to 111 lines – ED triage chest pain (last year) |
| Number of calls to 111 lines – face and neck pain or swelling (last year) |
| Number of calls to 111 lines – genital problems (last year) |
| Number of calls to 111 lines – fever (last year) |
| Number of calls to 111 lines – itch (last year) |
| Number of calls to 111 lines – mouth ulcers (last year) |
| Number of calls to 111 lines – pain and/or frequency of passing urine (last year) |
| Number of calls to 111 lines – rectal bleeding (last year) |
| Number of calls to 111 lines – rectal pain/swelling lump or itch (last year) |
| Number of calls to 111 lines – skin lumps (last year) |
| Number of calls to 111 lines – skin problems (last year) |
| Number of calls to 111 lines – tiredness/fatigue (last year) |
| Number of calls to 111 lines – urinary problems (last year) |
| Number of calls to 111 lines – vaginal bleeding (last year) |
| Number of calls to 111 lines – vaginal discharge (last year) |
| Number of calls to 111 lines – vomiting (last year) |
| Number of calls to 111 lines – vomiting blood (last year) |

**Hyperparameter optimisation**

We use the hyperopt python library (<https://hyperopt.github.io/hyperopt/>) to optimise the model hyperparameters. Hyperopt optimises a function’s value over a complex space of inputs. In Supplementary Table 2 you can see the distributions/associated parameters we used for each hyperparameter of the sparkXGboost models.

| **Supplementary Table 2**. Hyperparameters configuration (sparkXGboost model) | |
| --- | --- |
| **Hyperparameter** | **Distribution/parameter range** |
| min_child_weight | Log-Uniform[-2,3] |
| max_depth | Uniform [1,100] |
| learning_rate | Log-Uniform[-7,0] |
| subsample | Uniform[0.5,1] |
| colsample_bytree | Uniform[0.5,1] |
| gamma | Log-Uniform[-10,10] |
| reg_alpha | Log-Uniform[-2,3] |
| reg_lambda | Log-Uniform[-2,3] |
| eval_metric | AUC |

**Testing differences between test/validation and training datasets.**

We tested whether the train, validation and testing datasets are similar in terms of the main demographic variables. We conducted a chi-square test (for gender, ethnicity and index of multiple deprivation) with the results presented in the Supplementary Table 3 below. No statistically significant differences were observed. In the same table we also show the results from the Kruskal – Wallis test for the age variable. This test was used as the age variable does not seem to follow a normal distribution. The normality assumption for the age variable was tested using the D’Agostino and Pearson’s test [two-sided].

| **Supplementary Table 3**. Statistical tests (demographic variables) | | |
| --- | --- | --- |
| **Chi – Square Test [two-sided]** | | |
| **Feature** | **p-value** | **Degrees of freedom** |
| Gender | 0.177 | 2 |
| Ethnicity | 0.319 | 32 |
| Index of multiple deprivation | 0.9 | 20 |
| **Kruskal – Wallis Test** | | |
| **Feature** | **p-value** | |
| Age | 0.108 | |

**Dataset sizes**

| **Supplementary Table 4. Size of datasets used in the analysis** | | | |
| --- | --- | --- | --- |
| **Dataset** | **Non-bladder cancer** | **Bladder cancer** | **Total** |
| Train | 14169702 | 4272 | 14173974 |
| Undersampled Train | 4221 | 4272 | 8493 |
| Test | 4726358 | 1409 | 4727767 |
| Validation | 4724603 | 1449 | 4726052 |
|  |  |  |  |
| Whole population | 23620663 | 7130 | 23627793 |

**Python packages**

Analysis was completed on a spark cluster (3.5.0) using python 3.10. Versions for key packages used in the analysis are shown in Supplementary Table 5.

| **Supplementary Table 5**. Python libraries used for the analysis | |
| --- | --- |
| hyperopt | 0.2.7 |
| pandas | 1.5.1 |
| scikit-learn | 1.1.1 |
| shap | 0.44.0 |
| xgboost | 1.7.6 |
